# Supplementary material for: Mutualism between Gut-Borne Yeasts and Their Host, Thaumatotibia leucotreta, and Potential Usefulness in Pest Management
Source: MDPI journal article supplement (doi:10.3390/insects13030243), 2022-02-28
Supplement: s1 [file s1]

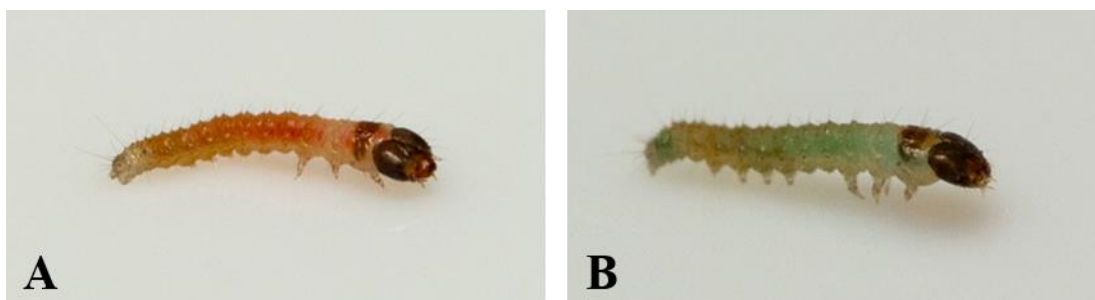

**Figure S1:** Feeding response of neonate *T. leucotreta* ( $n = 29$ ) to YPD medium containing either (A) red or (B) blue food colourant ( $P > 0.05$ ;  $t = 0.2133$ ;  $df = 27$  (Student's  $t$ -test)). Images captured by David Taylor.

**Table S1:** Oligonucleotides used to amplify and sequence the internal transcribed spacer (ITS) region and D1/D2 domain of large subunit (LSU) on yeast genomes (Pincus et al., 2007).

| Target       | Name | Sequence (5' – 3')              | Amplicon size (bp) |
|--------------|------|---------------------------------|--------------------|
| ITS region   | ITS1 | TCC GTC GGT GAA CCT GCG G       | 400 – 800          |
|              | ITS4 | TCC TCC GCT TAT TGA TAT GC      |                    |
| D1/D2 domain | NL 1 | GCA TAT CAA TAA GCG GAG GAA AAG | 600                |
|              | NL 4 | GGT CCG TGT TTC AAG ACG G       |                    |
